# Supplementary material for: The Chemistry of Polydopamine Film Formation: The Amine-Quinone Interplay
Source: PubMed Central journal article supplement (PMC6352855; doi:10.3390/biomimetics3030026), 2018-09-13
Supplement: biomimetics-03-00026-s001.pdf [file biomimetics-03-00026-s001.pdf]

# Supplementary Materials: The Chemistry of Polydopamine Film Formation: The Amine-Quinone Interplay

**Maria Laura Alfieri**<sup>1</sup>, **Lucia Panzella**<sup>1</sup>, **Stefano Luigi Oscurato**<sup>2</sup>, **Marcella Salvatore**<sup>2</sup>, **Roberto Avolio**<sup>3</sup>, **Maria Emanuela Errico**<sup>3</sup>, **Pasqualino Maddalena**<sup>2</sup>, **Alessandra Napolitano**<sup>1</sup> and **Marco d'Ischia**<sup>1,\*</sup>

<sup>1</sup> Department of Chemical Sciences, University of Naples Federico II, Via Cinthia 4, I-80126 Naples, Italy; marialaura.alfieri@unina.it (M.L.A.); panzella@unina.it (L.P.); alesnapo@unina.it (A.N.)

<sup>2</sup> Department of Physics "Ettore Pancini", University of Naples Federico II, Via Cinthia 4, I-80126 Naples, Italy; oscurato@fisica.unina.it (S.L.O.); marcella.salvatore@fisica.unina.it (M.S.); pasmad@fisica.unina.it (P.M.)

<sup>3</sup> Institute for Polymers, Composites and Biomaterials, National Council of Research of Italy (IPCB-CNR), via Campi Flegrei 34, I-80078 Pozzuoli, Italy; roberto.avolio@ipcb.cnr.it (R.A.); mariaemanuela.errico@ipcb.cnr.it (M.E.E.)

\* Correspondence: dischia@unina.it; Tel.: +39-081-674132

**Ethylenediamine**

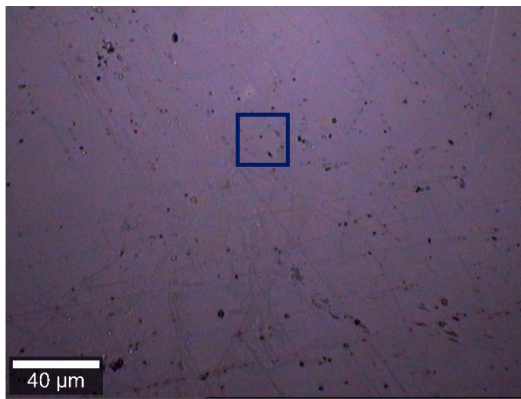

(a)

Mean Thickness: <5 nm

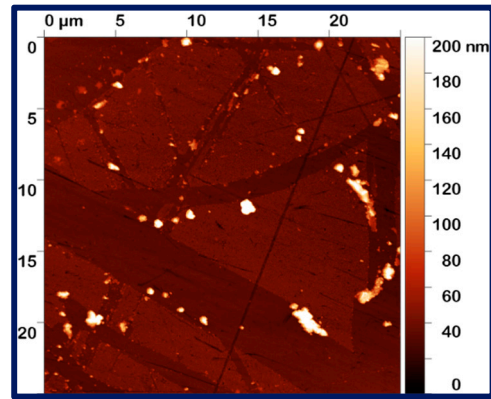

(b)

**Dodecylamine**

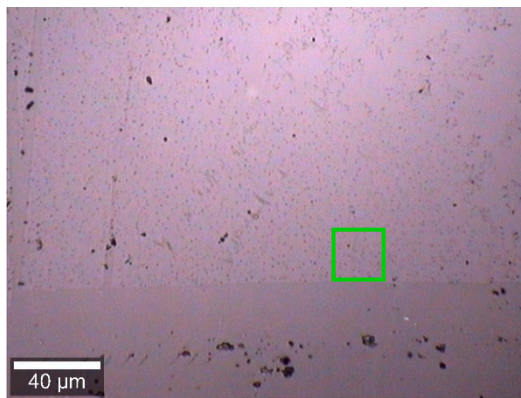

(a)

Mean Thickness:  $12 \pm 6$  nm

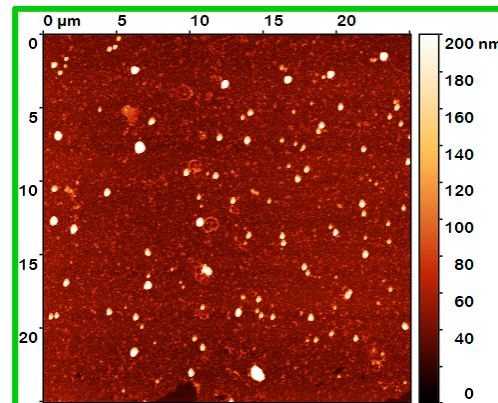

(b)

**1,4-Diaminobutane**

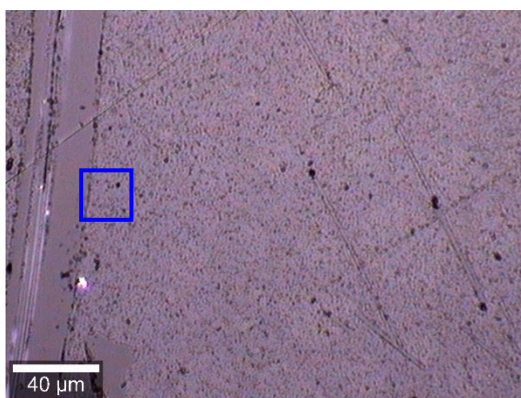

(a)

Mean Thickness:  $45 \pm 20$  nm

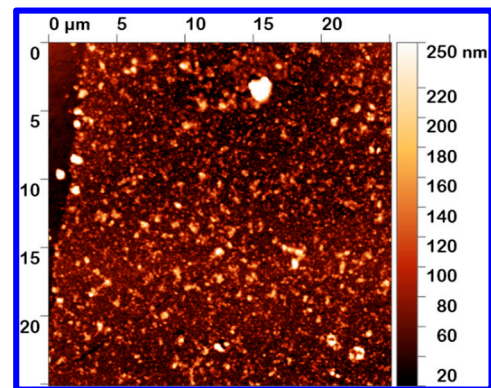

(b)

Figure S1. *Cont.*

### 1,10-Diaminododecane

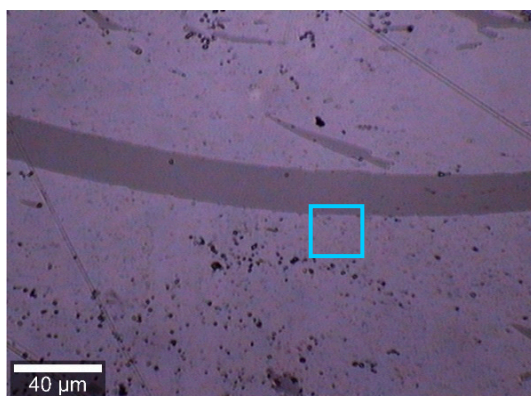

(a)

Mean Thickness:  $53 \pm 15$  nm

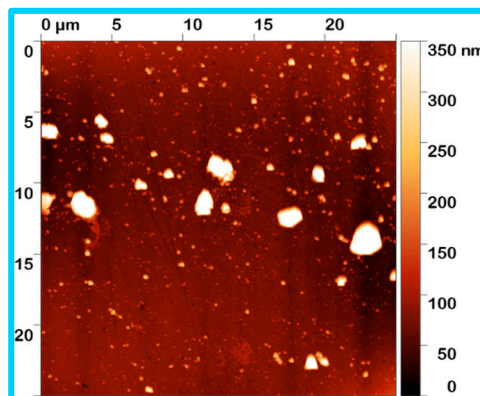

(b)

### 1,12-Diaminododecane

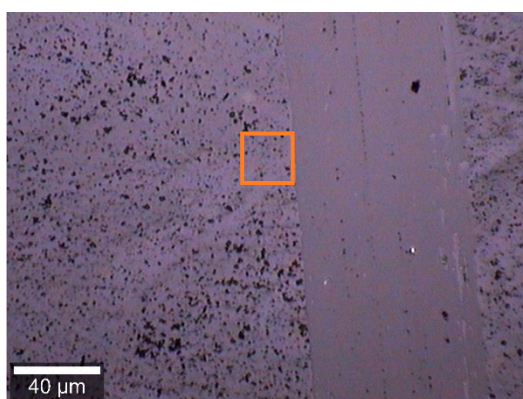

(a)

Mean Thickness:  $61 \pm 30$  nm

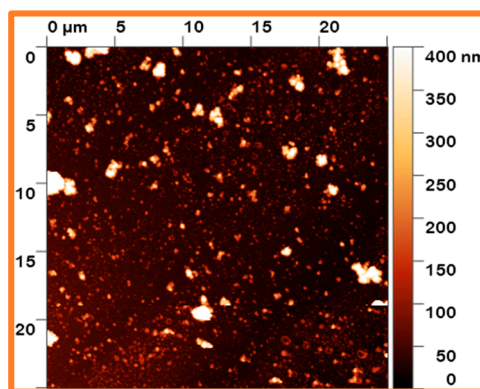

(b)

**Figure S1.** AFM analysis of the PDA film obtained in the presence of amines. (a) Bright-field image of the investigated sample region collected by 20× microscope objective. (b) AFM image of the area indicated by the square in the optical image.

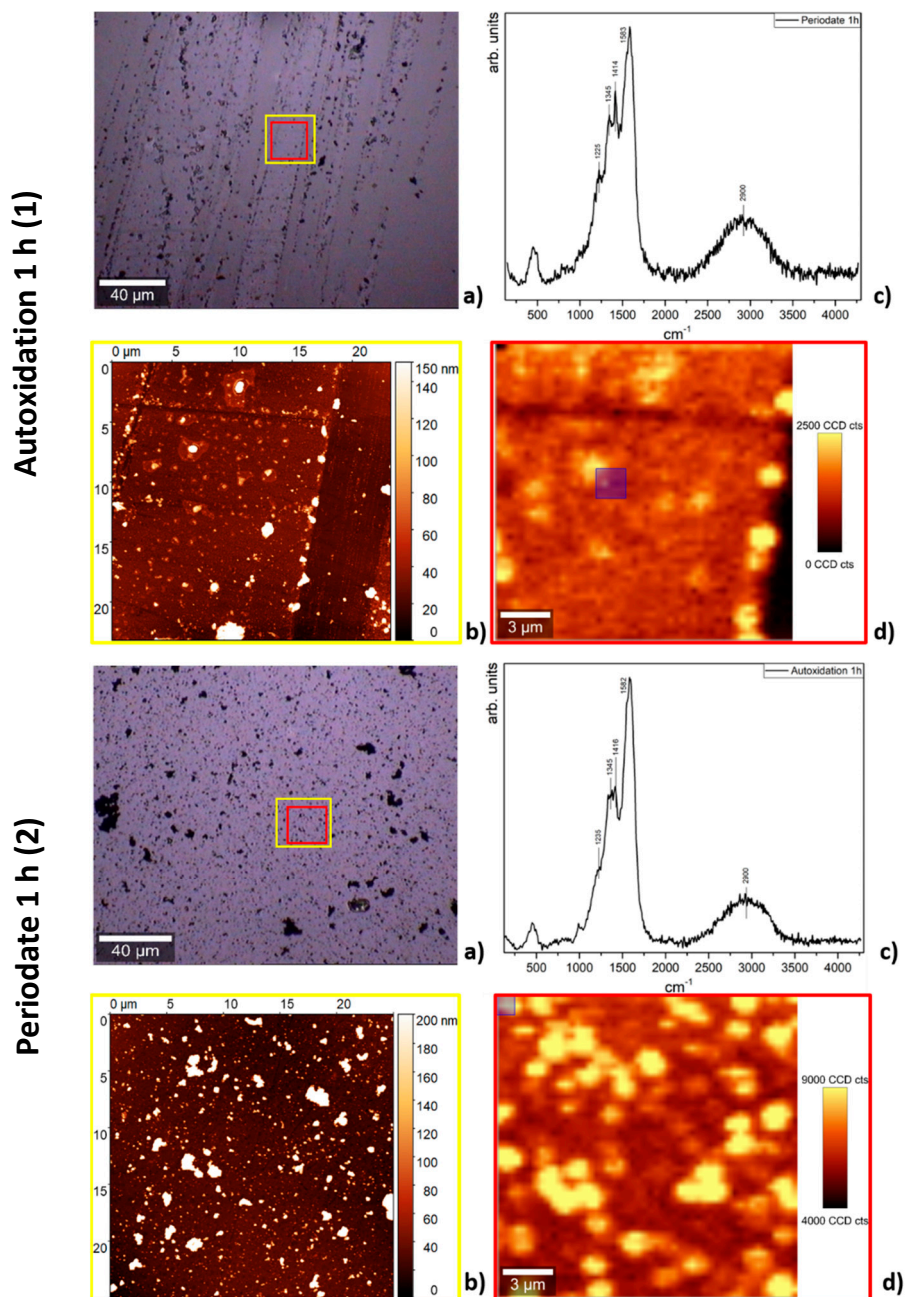

**Figure S2.** AFM and micro-Raman analysis of PDA films obtained in the presence and in absence of periodate at 1 h oxidation time. (a) Bright-field image of the investigated sample region collected by 20× microscope objective. (b) AFM image of the area indicated by the yellow square in the optical image. Average grain size: 60 nm (1), 100 nm (2). Film thickness:  $17 \pm 7$  nm (1),  $70 \pm 15$  nm (2). (c) Raman spectrum. (d) Micro-Raman image relative to the red sample region in the optical image.

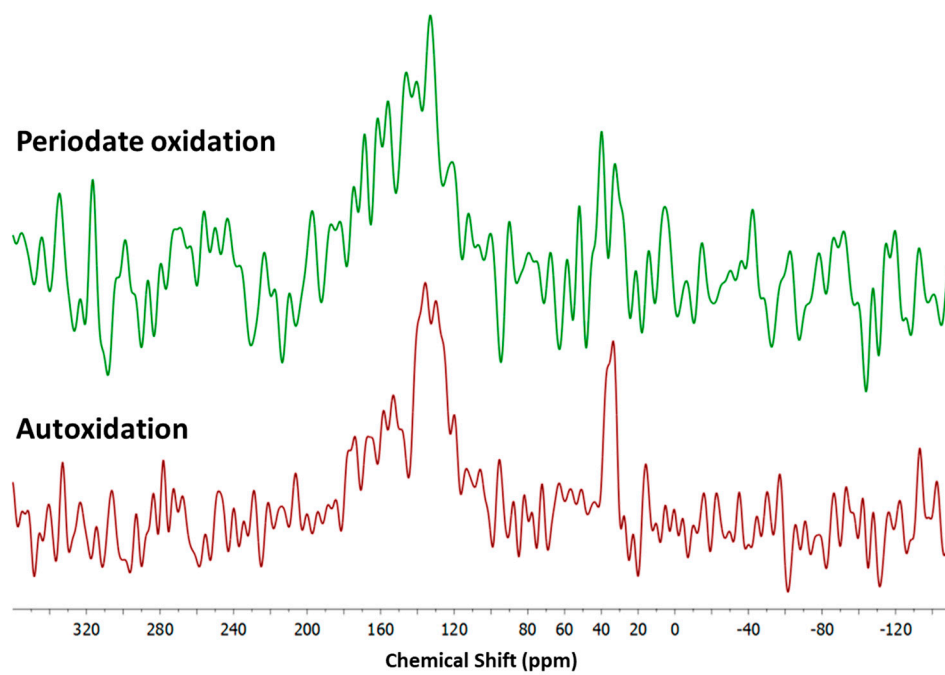

**Figure S3.**  $^{15}\text{N}$  spectra of samples produced by periodate oxidation (green spectrum) and autoxidation (red spectrum).
